# Supplementary material for: Review of Evaluation Metrics Used in Digital and Traditional Tobacco Control Campaigns
Source: PubMed Central journal article supplement (PMC7448186; doi:10.2196/17432), 2020-08-11
Supplement: jmir_v22i8e17432_app1.pdf [file jmir_v22i8e17432_app1.pdf]

---

**Stage 1a: Eligibility criteria for peer-review articles*****Inclusion criteria***

- Articles that included evaluation of a specific tobacco-related program that had a mass media campaign component. Campaigns were defined as purposive, public sector efforts to inform and influence a population or large segment of the population.

***Exclusion criteria***

- Did not reference a specific campaign by name.
- Article reported on recruitment of intervention participants using digital platforms.
- Intervention did not have a mass communication component.
- Experimental studies (not in real-world setting).
- Analyses of media or online coverage of tobacco messages.
- Formative research into message testing, or media use patterns to inform campaign design.
- Studies focused on validating scales by using a specific campaign as a case study.
- Studies that compared multiple campaigns, without evaluation of individual campaigns.

---

**Stage 1b: Eligibility criteria for marketing reports*****Inclusion criteria***

- Reports that described tobacco control campaigns, regardless of whether evaluation results were included in the marketing report.
- Campaigns that included short period burst campaigns, or campaigns that drove audience to cessation services.
- Reports about individual initiatives that were part of a larger campaign.

***Exclusion criteria***

- Campaigns which were not specifically tobacco-related (e.g. heart health campaigns).
  - Marketing campaigns by tobacco companies.
  - Single public relations (PR) event campaigns and advocacy campaigns (e.g. introducing policy
-

about plain packaging) due to the different nature of intended outcomes.

---

## **Stage 2: Eligibility criteria for campaigns**

### ***Inclusion criteria***

#### *Campaign criteria*

- Sufficient detail about how the campaign was conducted, including the media platforms employed, and how each platform was used.\* Information about financial spend on each platform was useful, but not essential.
- Primary purpose of the intervention was campaign-related, with specific activities to promote a campaign message.
- Campaign included at least one digital component, with sufficient details of what the digital component involved.
- Campaign activities could be paid or unpaid.

#### *Evaluation criteria*

- Sufficient details on the methodology of how the evaluation was conducted.\*

### ***Exclusion criteria***

- Insufficient information to assess the campaign activities, i.e. only general descriptions of campaign activities, such as 'digital advertising' or 'social media campaigns' with no further details provided.\*
- Campaigns targeting e-cigarettes and waterpipe smoking.

\*Information sourced from peer-reviewed journal articles or campaign reports (marketing literature or other grey literature). If available, additional information from websites or social media sites was used to help supplement this process.

---
